# Supplementary material
Source: PubMed Central journal article supplement (PMC6085893)
Supplement: NIHMS934691-supplement.pdf [file NIHMS934691-supplement.pdf]

## Current Status of Animal Models of Posttraumatic Stress Disorder: Behavioral and Biological Phenotypes, and Future Challenges in Improving Translation

### *Supplemental Information*

**Supplemental Table S1: PTSD-related phenotypes in animal models of PTSD – Effects in males**

| Model                          | Hyperalgesia                                                                                             | General avoidance                                                                                                                                                                              | Avoidance of trauma-specific cues                                                                                 | Increased fear learning                                                                                                   | Reduced fear extinction                                        | Arousal                                                                                                           | Depression/Anhedonia                                                                                           | Memory deficits (hippocampal function)                                                                                                                                     |
|--------------------------------|----------------------------------------------------------------------------------------------------------|------------------------------------------------------------------------------------------------------------------------------------------------------------------------------------------------|-------------------------------------------------------------------------------------------------------------------|---------------------------------------------------------------------------------------------------------------------------|----------------------------------------------------------------|-------------------------------------------------------------------------------------------------------------------|----------------------------------------------------------------------------------------------------------------|----------------------------------------------------------------------------------------------------------------------------------------------------------------------------|
| <b>Inescapable foot shocks</b> | Thermal hyperalgesia (hot-plate test) (1wk) (1)                                                          | - <b>avoidance</b> (EPM) (1-56 days) (1-3); <sup>-</sup> social behavior (SIT) (1-56 days) (2; 4); - avoidance of conspecific or open spaces (10 days) (4)                                     | - <b>freezing (situational reminder)</b> (1-56 days) (5; 6)                                                       | N/A                                                                                                                       | N/A                                                            | - startle (4 wks) (7)                                                                                             | - <b>immobility</b> (FST) (31 days) (8)                                                                        | <sup>-</sup> <b>spatial learning</b> (MWM) (1 wk) (1); <sup>-</sup> short-term memory (NORT) (9)                                                                           |
| <b>Predator scent/stress</b>   | - thermal nociception (Hargreaves) (5 days) (10)                                                         | - <b>avoidance (EPM, LD)</b> (1 wk-3 months) (11-16); <sup>-</sup> social behaviors (SIT) (4 wks) (17)                                                                                         | - <b>avoidance in trauma reminder test</b> (9-14 days) (15; 18); - freezing (situational reminder) (1-4 wks) (17) | - freezing in contextual fear memory (3 months) (12; 13)                                                                  | <sup>-</sup> extinction (3 wks-3 months) (12; 13)              | - <b>startle and startle habituation</b> (1 wk-3 months) (11; 12; 17); <sup>-</sup> PPI (9 days) (19); NE in mice | N/A                                                                                                            | <sup>-</sup> object recognition memory; <sup>-</sup> spatial memory (RAWM) (3 wks-3 months) (13; 20)                                                                       |
| <b>Single prolonged stress</b> | - <b>mechanical hyperalgesia</b> (von Frey test) (1 wk) (21)                                             | - <b>avoidance</b> (OF, EPM, LD) (1-3 wks) (21-26)                                                                                                                                             | N/A                                                                                                               | - <b>context and cue fear recall</b> (1 wk) (26-31)                                                                       | <sup>-</sup> <b>extinction recall</b> (1-2wks) (23; 27; 32-34) | - <b>startle</b> (1-2 wks) (25; 28); <sup>-</sup> PPI <sup>m</sup> (1-2 wks) (35)                                 | - immobility (FST) (1 wk) (25); anhedonia (SP) (1-3 wks) (23; 24)                                              | <sup>-</sup> <b>spatial learning and memory</b> (MWM, RAWM) (1-2 wks) (24; 28; 36); <sup>-</sup> cognitive flexibility (1 wk) (37)                                         |
| <b>IMO/restraint stress</b>    | N/A                                                                                                      | - avoidance (EPM, LD) (10-14 days) (38-43)                                                                                                                                                     | N/A                                                                                                               | - <b>cue fear recall</b> (1wk) (38; 44); - generalization (10 days) (41); <sup>-</sup> context fear (10-35 days) (41; 45) | <sup>-</sup> <b>extinction</b> (10 days) (41; 44)              | - startle (7-12 days) (42; 46)                                                                                    | - immobility (FST) and anhedonia (SP) (5 wks) (45)                                                             | <sup>-</sup> spatial memory (MWM) (9-11 days) (38; 47)                                                                                                                     |
| <b>UVS</b>                     | - thermal hyperalgesia (hot plate test or acetone test); - licking behavior (formalin test) (5 wks) (48) | - <b>avoidance</b> (EPM, OF, novelty-suppressed feeding test, MB) (1-3 wks) (49-56); - avoidance (avoidance/escape task) (2 wks) (57); no changes in inhibitory avoidance task (1-7 days) (55) | N/A                                                                                                               | - contextual freezing <sup>m</sup> (1 wk) (58)                                                                            | <sup>-</sup> extinction (1 wk) (58)                            | - startle (54; 55)                                                                                                | - <b>immobility</b> (FST, TST) (1-10 wks) (50; 54; 59; 60); - <b>anhedonia</b> (SP) (1-3 wks) (49; 50; 52; 59) | <sup>-</sup> <b>spatial memory</b> (EPM, NORT, MWM) (1-2 wks) (59; 61-63); <sup>-</sup> working memory (T-maze) (1 wk) (64); <sup>-</sup> memory in passive avoidance (65) |
| <b>Social defeat</b>           | - <b>thermal analgesia (hot plate test)</b> (66); - <b>hyperalgesia (mechanical)</b> (4-10 days) (67)    | - <b>avoidance</b> (EPM, OF) (1d-4wk) (68; 69)                                                                                                                                                 | - <b>social avoidance</b> (SAAT, SIT) (4-10 days) (70)                                                            | Inconsistent data on cue and context fear (2-21 days) (71-74)                                                             | - extinction (2-5 days) (75-77)                                | - <b>startle</b> (1-4 days) (78-80)                                                                               | - <b>anhedonia</b> (SP, ICSS, PRT) (3-21 days) (81-85)                                                         | <sup>-</sup> <b>working memory</b> (T maze); <sup>-</sup> spatial memory (MWM); <sup>-</sup> recognition memory (NORT) (5-20 days) (68; 86-88)                             |

<sup>m</sup>effect reported only in mice; EPM, elevated plus maze; FST, forced swim test; ICSS, intracranial self-stimulation; IMO, immobilization; LD, light-dark box; MWM, Morris water maze; MB, marble burying; NE, no effect; NORT, novel object recognition task; OF, open field; PPI, prepulse inhibition of acoustic startle; PRT, probabilistic reward task; RAWM, radial arm water maze; SAAT, social approach-avoidance test; SIT, social interaction test; SP, sucrose preference; TST, tail suspension test; UVS, unpredictable variable stress. **In bold:** most robust and reproduced findings. **N.B.:** The studies describing several PTSD-like phenotypes are not exclusive to this table, most comprehensive and robust findings as well as recency were used to prioritize addition of citation to the table.

**Supplemental Table S2: PTSD-related phenotypes reproduced in animal models of PTSD – Effects in females**

| Model                          | Hyperalgesia | General avoidance                                                              | Avoidance of trauma-specific cues                                                 | Increased fear learning                   | Reduced fear extinction | Arousal                        | Depression/Anhedonia              | Memory deficits (hippocampal function)  |
|--------------------------------|--------------|--------------------------------------------------------------------------------|-----------------------------------------------------------------------------------|-------------------------------------------|-------------------------|--------------------------------|-----------------------------------|-----------------------------------------|
| <b>Inescapable foot shocks</b> | N/A          | No changes in avoidance (OF) (10 days) (89)                                    | - avoidance to open spaces (90); - freezing (situational reminder) (10 days) (89) | N/A                                       | N/A                     | N/A                            | N/A                               | N/A                                     |
| <b>Predator scent/stress</b>   | N/A          | - avoidance (EPM) (1 wk) (91);<br>- avoidance (composite of OF/LD) (1 wk) (92) | - avoidance in trauma-reminder test (2 wks) (92)                                  | N/A                                       | N/A                     | - or - startle (1 wk) (91; 92) | N/A                               | No changes in spatial memory (MWM) (91) |
| <b>Single prolonged stress</b> | N/A          | N/A                                                                            | N/A                                                                               | - context and cue fear recall (1 wk) (31) | N/A                     | N/A                            | N/A                               | N/A                                     |
| <b>IMO/restraint stress</b>    | N/A          | N/A                                                                            | N/A                                                                               | N/A                                       | N/A                     | N/A                            | N/A                               | N/A                                     |
| <b>UVS</b>                     | N/A          | - avoidance (OF) (93)                                                          | N/A                                                                               | N/A                                       | N/A                     | N/A                            | - immobility (FST, TST) (60; 93)  | N/A                                     |
| <b>Social defeat</b>           | N/A          | N/A                                                                            | - social avoidance (SAAT, SIT) (4-10 days) (94)                                   | N/A                                       | N/A                     | N/A                            | - anhedonia (SP) (3-21 days) (95) | N/A                                     |

EPM, elevated plus maze; MWM, Morris water maze; OF, open field; REM, rapid eye movement; SAAT, social approach-avoidance test; SIT, social interaction test; SP, sucrose preference; TST, tail suspension test; UVS, unpredictable variable stress.

**Supplemental Table S3: PTSD-related biological phenotypes reproduced in animal models of PTSD – Effects in females**

| Model                          | Fear circuit dysfunctions (PFC-Amygdala)                             | HPA axis function                                             | Peripheral vs. Central inflammation | Hippocampal structure/morphology                                                         | Sleep disturbances                                | Reversed by SSRIs |
|--------------------------------|----------------------------------------------------------------------|---------------------------------------------------------------|-------------------------------------|------------------------------------------------------------------------------------------|---------------------------------------------------|-------------------|
| <b>Inescapable foot shocks</b> | N/A                                                                  | Plasma: No changes in basal CORT (10 days) (89)<br>Brain: N/A | Plasma: N/A<br>Brain: N/A           | N/A                                                                                      | N/A                                               | N/A               |
| <b>Predator scent/stress</b>   | N/A                                                                  | Plasma: - basal CORT (1 wk) (91)<br>Brain: N/A                | Plasma: N/A<br>Brain: N/A           | N/A                                                                                      | N/A                                               | N/A               |
| <b>Single prolonged stress</b> | N/A                                                                  | Plasma: N/A<br>Brain: N/A                                     | Plasma: N/A<br>Brain: N/A           | - LTP/LTD (1 wk) (31)                                                                    | N/A                                               | N/A               |
| <b>IMO/Restraint stress</b>    | N/A                                                                  | Plasma: N/A<br>Brain: N/A                                     | Plasma: N/A<br>Brain: N/A           | Mild or no change compared to males (96; 97), but stronger decrease of neurogenesis (98) | Mild or no change in NREM & REM (1 day) (99; 100) | N/A               |
| <b>UVS</b>                     | - cFos-positive cells (PFC) and<br>- c-Fos-positive cells (Amy) (93) | Plasma: N/A<br>Brain: N/A                                     | Plasma: N/A<br>Brain: N/A           | N/A                                                                                      | N/A                                               | N/A               |
| <b>Social defeat</b>           | N/A                                                                  | Plasma: - basal CORT (12 days) (101)<br>Brain: N/A            | Plasma: N/A<br>Brain: N/A           | N/A                                                                                      | - REM; - NREM (1-28 days) (101)                   | N/A               |

Amy, amygdala; CORT, corticosterone; HPA, hypothalamic-pituitary-adrenal; LTP/LTD, long-term potentiation/depression; NREM, non-rapid eye movement; PFC, prefrontal cortex; REM, rapid eye movement; SSRIs, selective serotonin reuptake inhibitors; UVS, unpredictable variable stress.

Supplemental Table S4. Additional tools to probe gene pathways and circuits implicated in PTSD pathophysiology

| Manipulation                                                                | Schematic representation                                                                                                                                                                                                                                                                                                                                                                                                                                                                                        | Description                                                                                                                                                                                                                                        | References           |
|-----------------------------------------------------------------------------|-----------------------------------------------------------------------------------------------------------------------------------------------------------------------------------------------------------------------------------------------------------------------------------------------------------------------------------------------------------------------------------------------------------------------------------------------------------------------------------------------------------------|----------------------------------------------------------------------------------------------------------------------------------------------------------------------------------------------------------------------------------------------------|----------------------|
| <p><b>Conditional, cell-type specific modulation of gene expression</b></p> | <p>Breeding genetically modified mouse lines carrying transgenes controlled via cell-type-specific promoter and drug responsive promoter</p> 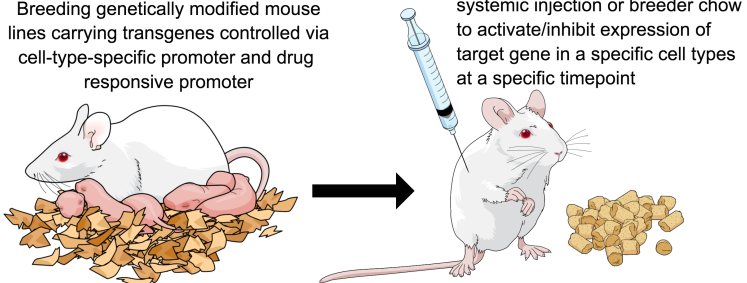 <p>Administration of the drug through systemic injection or breeder chow to activate/inhibit expression of target gene in a specific cell types at a specific timepoint</p>                                                                                                     | <p>Regulate gene expression in specific cell types to selectively manipulate PTSD-relevant signaling pathways in specific circuits at various time-points before and after stress manipulations</p>                                                | <p>(92; 102-104)</p> |
| <p><b>Optogenetic approach</b></p>                                          |  <p>DNA coding channelrhodopsin (light-gated ion channel) and cell-type specific promoter inserted into viral vector</p> <p>Virus inserted into brain region of interest of wild-type mouse or mouse with genetic modifications that limit channelrhodopsin expression to specific cell type</p> <p>Implantation of optical fiber used to deliver light to activate/inhibit neuron firing via channelrhodopsin activation</p> | <p>High resolution and dynamic control of excitability of neurons in PTSD-relevant circuits and cell types (via activation of light-gated ion channels)</p>                                                                                        | <p>(105-107)</p>     |
| <p><b>Chemogenetic approach: DREADD</b></p>                                 |  <p>DNA coding for the DREADD and fluorescent tag inserted into a viral vector</p> <p>Viral vector injected into a specific brain region, where it starts to express the DREADD and fluorescent tag</p> <p>CNO administered and binds to DREADD to selectively manipulate second messenger signaling in specific cell types</p>                                                                                              | <p>Express mutated GPCRs (Gi, Gs, Gq) selectively activated by otherwise inert drugs (e.g. CNO); enables acute and chronic modulation of cell function via activation of select second messenger cascades in specific cell types and circuits.</p> | <p>(108-110)</p>     |

CNO, Clozapine-N-oxide; DREADD, Designer Receptors Exclusively Activated by Designer Drugs; GPCRs, G-protein coupled receptors. The figures presented in the table were created on the Mind the Graph platform [www.mindthegraph.com](http://www.mindthegraph.com).

**Box S1. Model organisms for studying PTSD pathology and its treatment: future directions**

Numerous well-established and robust paradigms that induce specific patterns of enduring PTSD-relevant behavioral and biological phenotypes are now available. The focus in future will be to refine these models as clinical studies of PTSD pathology and treatment response mature.

**What is urgently needed to understand the validity of current PTSD models?** Characterize (1) effects in females, (2) sensitivity of these paradigms to early-life stress, and (3) identify behavioral and biological risk factors that predict individual response variance across models.

**How can we enhance translation of treatments to clinical trials?** Incorporate biological measures that are homologous across-species (e.g. peripheral biomarkers, imaging, physiology) to (1) identify predictors of individual risk that also measurable in clinic and (2) provide biological outcome measures to complement behavioral measures of stress response. Clinical studies should also incorporate homologous biological measures to inform model validity.

**What tools are on the horizon?** Optogenetic and DREADD technologies support testing of complex circuit models of PTSD etiology. Once validated, they could provide circuit-based models of PTSD pathology that will complement current stress manipulation models.

**Supplemental References**

1. Yang C (2014): Glutamate and GABA imbalance promotes neuronal apoptosis in hippocampus after stress. *Med Sci Monit.* 20: 499–512.
2. Berardi A, Trezza V, Palmery M, Trabace L, Cuomo V, Campolongo P (2014): An updated animal model capturing both the cognitive and emotional features of post-traumatic stress disorder (PTSD). *Front Behav Neurosci.* 8: 142.
3. Jin ZL, Liu JX, Liu X, Zhang LM, Ran YH, Zheng YY, *et al.* (2016): Anxiolytic effects of GLYX-13 in animal models of posttraumatic stress disorder-like behavior. *J Psychopharmacol (Oxford).* 30: 913–921.
4. Chen X, Li Y, Li S, Kirouac GJ (2012): Early fear as a predictor of avoidance in a rat model of post-traumatic stress disorder. *Behav Brain Res.* 226: 112–117.
5. Bentefour Y, Rakibi Y, Bennis M, Ba-M'hamed S, Garcia R (2016): Paroxetine treatment, following behavioral suppression of PTSD-like symptoms in mice, prevents relapse by activating the infralimbic cortex. *Eur Neuropsychopharmacol.* 26: 195–207.
6. Philbert J, Pichat P, Beeské S, Decobert M, Belzung C, Griebel G (2011): Acute inescapable stress exposure induces long-term sleep disturbances and avoidance behavior: A mouse model of post-traumatic stress disorder (PTSD). *Behav Brain Res.* 221: 149–154.
7. Kao C-Y, He Z, Zannas AS, Hahn O, Kühne C, Reichel JM, *et al.* (2016): Fluoxetine treatment prevents the inflammatory response in a mouse model of posttraumatic stress disorder. *J Psychiatr Res.* 76: 74–83.

8. Hendriksen H, Bink DI, Vergoossen DLE, van Slobbe ES, Olivier B, Oosting RS (2015): Food restriction does not relieve PTSD-like anxiety. *European Journal of Pharmacology*. 753: 177–182.
9. Philbert J, Pichat P, Palme R, Belzung C, Griebel G (2012): The CRF<sub>1</sub> receptor antagonist SSR125543 attenuates long-term cognitive deficit induced by acute inescapable stress in mice, independently from the hypothalamic pituitary adrenal axis. *Pharmacol Biochem Behav*. 102: 415–422.
10. Roltsch EA, Baynes BB, Mayeux JP, Whitaker AM, Baiamonte BA, Gilpin NW (2014): Predator odor stress alters corticotropin-releasing factor-1 receptor (CRF1R)-dependent behaviors in rats. *Neuropharmacology*. 79: 83–89.
11. Cohen H, Kaplan Z, Kozlovsky N, Gidron Y, Matar MA, Zohar J (2010): Hippocampal microinfusion of oxytocin attenuates the behavioural response to stress by means of dynamic interplay with the glucocorticoid-catecholamine responses. *J Neuroendocrinol*. 22: 889–904.
12. Seetharaman S, Fleshner M, Park CR, Diamond DM (2016): Influence of daily social stimulation on behavioral and physiological outcomes in an animal model of PTSD. *Brain Behav*. 6: e00458.
13. Zoladz PR, Park CR, Fleshner M, Diamond DM (2015): Psychosocial predator-based animal model of PTSD produces physiological and behavioral sequelae and a traumatic memory four months following stress onset. *Physiology & behavior*. 147: 183–192.
14. Wilson CB, McLaughlin LD, Ebenezer PJ, Nair AR, Dange R, Harre JG, *et al.* (2014): Differential effects of sertraline in a predator exposure animal model of post-traumatic stress disorder. *Front Behav Neurosci*. 8: 256.
15. Deslauriers J, van Wijngaarde M, Geyer MA, Powell S, Risbrough VB (2017): Effects of LPS-induced immune activation prior to trauma exposure on PTSD-like symptoms in mice. *Behav Brain Res*. 323: 117–123.
16. Adamec R, Fougere D, Risbrough V (2009): CRF receptor blockade prevents initiation and consolidation of stress effects on affect in the predator stress model of PTSD. *Int J Neuropsychopharmacol*. 13: 747–757.
17. Elharrar E, Warhaftig G, Issler O, Sztainberg Y, Dikshtein Y, Zahut R, *et al.* (2013): Overexpression of corticotropin-releasing factor receptor type 2 in the bed nucleus of stria terminalis improves posttraumatic stress disorder-like symptoms in a model of incubation of fear. *Biol Psychiatry*. 74: 827–836.
18. Saridoğan GE, Aykaç A, Cabadak H, Cerit C, Çalışkan M, Gören MZ (2015): D-Cycloserine acts via increasing the GluN1 protein expressions in the frontal cortex and decreases the avoidance and risk assessment behaviors in a rat traumatic stress model. *Behav Brain Res*. 293: 227–233.
19. Bakshi VP, Alsene KM, Roseboom PH, Connors EE (2012): Enduring sensorimotor gating abnormalities following predator exposure or corticotropin-releasing factor in rats: a model for PTSD-like information-processing deficits? *Neuropharmacology*. 62: 737–748.
20. Conboy L, Tanrikut C, Zoladz PR, Campbell AM, Park CR, Gabriel C, *et al.* (2009): The antidepressant agomelatine blocks the adverse effects of stress on memory and enables spatial learning to rapidly increase neural cell adhesion molecule (NCAM) expression in the hippocampus of rats. *Int J Neuropsychopharmacol*. 12: 329–341.
21. Sun R, Zhang Z, Lei Y, Liu Y, Lu C, Rong H, *et al.* (2016): Hippocampal activation of microglia may underlie the shared neurobiology of comorbid posttraumatic stress disorder and chronic pain. *Mol Pain*. 12. doi: 10.1177/1744806916679166.

22. Lee B, Sur B, Yeom M, Shim I, Lee H, Hahm D-H (2016): Effects of systemic administration of ibuprofen on stress response in a rat model of post-traumatic stress disorder. *Korean J Physiol Pharmacol.* 20: 357–366.
23. Lin C-C, Tung C-S, Liu Y-P (2016): Escitalopram reversed the traumatic stress-induced depressed and anxiety-like symptoms but not the deficits of fear memory. *Psychopharmacology.* 233: 1135–1146.
24. Patki G, Li L, Allam F, Solanki N, Dao AT, Alkadhi K, Salim S (2014): Moderate treadmill exercise rescues anxiety and depression-like behavior as well as memory impairment in a rat model of posttraumatic stress disorder. *Physiology & behavior.* 130: 47–53.
25. Serova LI, Tillinger A, Alaluf LG, Laukova M, Keegan K, Sabban EL (2013): Single intranasal neuropeptide Y infusion attenuates development of PTSD-like symptoms to traumatic stress in rats. *Neuroscience.* 236: 298–312.
26. Wang H, Zuo D, He B, Qiao F, Zhao M, Wu Y (2012): Conditioned fear stress combined with single-prolonged stress: a new PTSD mouse model. *Neurosci Res.* 73: 142–152.
27. Knox D, Nault T, Henderson C, Liberzon I (2012): Glucocorticoid receptors and extinction retention deficits in the single prolonged stress model. *Neuroscience.* 223: 163–173.
28. Kohda K, Harada K, Kato K, Hoshino A, Motohashi J, Yamaji T, *et al.* (2007): Glucocorticoid receptor activation is involved in producing abnormal phenotypes of single-prolonged stress rats: a putative post-traumatic stress disorder model. *Neuroscience.* 148: 22–33.
29. Perrine SA, Eagle AL, George SA, Mulo K, Kohler RJ, Gerard J, *et al.* (2016): Severe, multimodal stress exposure induces PTSD-like characteristics in a mouse model of single prolonged stress. *Behav Brain Res.* 303: 228–237.
30. Takahashi T, Morinobu S, Iwamoto Y, Yamawaki S (2006): Effect of paroxetine on enhanced contextual fear induced by single prolonged stress in rats. *Psychopharmacology.* 189: 165–173.
31. Zer-Aviv TM, Akirav I (2016): Sex differences in hippocampal response to endocannabinoids after exposure to severe stress. *Hippocampus.* 26: 947–957.
32. Knox D, Perrine SA, George SA, Galloway MP, Liberzon I (2010): Single prolonged stress decreases glutamate, glutamine, and creatine concentrations in the rat medial prefrontal cortex. *Neurosci Lett.* 480: 16–20.
33. Lin C-C, Tung C-S, Lin P-H, Huang C-L, Liu Y-P (2016): Traumatic stress causes distinctive effects on fear circuit catecholamines and the fear extinction profile in a rodent model of posttraumatic stress disorder. *Eur Neuropsychopharmacol.* 26: 1484–1495.
34. Yamamoto S, Morinobu S, Fuchikami M, Kurata A, Kozuru T, Yamawaki S (2008): Effects of single prolonged stress and D-cycloserine on contextual fear extinction and hippocampal NMDA receptor expression in a rat model of PTSD. *Neuropsychopharmacology.* 33: 2108–2116.
35. Wang H-N, Bai Y-H, Chen Y-C, Zhang R-G, Wang H-H, Zhang Y-H, *et al.* (2015): Repetitive transcranial magnetic stimulation ameliorates anxiety-like behavior and impaired sensorimotor gating in a rat model of post-traumatic stress disorder. *PLoS ONE.* 10: e0117189.
36. Wang H-T, Han F, Shi Y-X (2009): Activity of the 5-HT<sub>1A</sub> receptor is involved in the alteration of glucocorticoid receptor in hippocampus and corticotropin-releasing factor in hypothalamus in SPS rats. *Int J Mol Med.* 24: 227–231.

37. George SA, Rodriguez-Santiago M, Riley J, Abelson JL, Floresco SB, Liberzon I (2015): Alterations in cognitive flexibility in a rat model of post-traumatic stress disorder. *Behav Brain Res.* 286: 256–264.
38. Andero R, Brothers SP, Jovanovic T, Chen YT, Salah-Uddin H, Cameron M, *et al.* (2013): Amygdala-dependent fear is regulated by Oprl1 in mice and humans with PTSD. *Sci Transl Med.* 5: 188ra73.
39. Belda X, Fuentes S, Nadal R, Armario A (2008): A single exposure to immobilization causes long-lasting pituitary-adrenal and behavioral sensitization to mild stressors. *Hormones and behavior.* 54: 654–661.
40. Belda X, Márquez C, Armario A (2004): Long-term effects of a single exposure to stress in adult rats on behavior and hypothalamic-pituitary-adrenal responsiveness: comparison of two outbred rat strains. *Behav Brain Res.* 154: 399–408.
41. Chauveau F, Lange MD, Jüngling K, Lesting J, Seidenbecher T, Pape H-C (2012): Prevention of stress-impaired fear extinction through neuropeptide s action in the lateral amygdala. *Neuropsychopharmacology.* 37: 1588–1599.
42. Fuentes S, Carrasco J, Armario A, Nadal R (2014): Behavioral and neuroendocrine consequences of juvenile stress combined with adult immobilization in male rats. *Hormones and behavior.* 66: 475–486.
43. Mitra R, Jadhav S, McEwen BS, Vyas A, Chattarji S (2005): Stress duration modulates the spatiotemporal patterns of spine formation in the basolateral amygdala. *Proc Natl Acad Sci USA.* 102: 9371–9376.
44. Sawamura T, Klengel T, Armario A, Jovanovic T, Norrholm SD, Ressler KJ, Andero R (2016): Dexamethasone Treatment Leads to Enhanced Fear Extinction and Dynamic Fkbp5 Regulation in Amygdala. *Neuropsychopharmacology.* 41: 832–846.
45. Chu X, Zhou Y, Hu Z, Lou J, Song W, Li J, *et al.* (2016): 24-hour-restraint stress induces long-term depressive-like phenotypes in mice. *Sci Rep.* 6: 32935.
46. Walker FR, Hodyl NA, Hodgson DM (2009): Neonatal bacterial endotoxin challenge interacts with stress in the adult male rat to modify KLH specific antibody production but not KLH stimulated ex vivo cytokine release. *J Neuroimmunol.* 207: 57–65.
47. Andero R, Daviu N, Escorihuela RM, Nadal R, Armario A (2012): 7,8-dihydroxyflavone, a TrkB receptor agonist, blocks long-term spatial memory impairment caused by immobilization stress in rats. *Hippocampus.* 22: 399–408.
48. Bravo L, Micó JA, Rey-Brea R, Pérez-Nievas B, Leza JC, Berrocoso E (2012): Depressive-like states heighten the aversion to painful stimuli in a rat model of comorbid chronic pain and depression. *Anesthesiology.* 117: 613–625.
49. Stedenfeld KA, Clinton SM, Kerman IA, Akil H, Watson SJ, Sved AF (2011): Novelty-seeking behavior predicts vulnerability in a rodent model of depression. *Physiology & behavior.* 103: 210–216.
50. Aslani S, Harb MR, Costa PS, Almeida OFX, Sousa N, Palha JA (2014): Day and night: diurnal phase influences the response to chronic mild stress. *Front Behav Neurosci.* 8: 82.
51. Cotella EM, Durando PE, Suárez MM (2014): A double-hit model of stress dysregulation in rats: implications for limbic corticosteroid receptors and anxious behavior under amitriptyline treatment. *Stress.* 17: 235–246.

52. Zhang L-M, Zhao N, Guo W-Z, Jin Z-L, Chen H-X, Xue R, *et al.* (2013): Antidepressant-like and anxiolytic-like effects of YL-IPA08, a potent ligand for the translocator protein (18 kDa). *Neuropharmacology*. doi: 10.1016/j.neuropharm.2013.09.016.
53. Li W, Zhu Y, Saud SM, Guo Q, Xi S, Jia B, *et al.* (2017): Electroacupuncture relieves depression-like symptoms in rats exposed to chronic unpredictable mild stress by activating ERK signaling pathway. *Neurosci Lett*. 642: 43–50.
54. Xu C, Ma X-M, Chen H-B, Zhou M-H, Qiao H, An S-C (2016): Orbitofrontal cortex 5-HT<sub>2A</sub> receptor mediates chronic stress-induced depressive-like behaviors and alterations of spine density and Kalirin7. *Neuropharmacology*. 109: 7–17.
55. Santos Dos TM, Kolling J, Siebert C, Biasibetti H, Bertó CG, Grun LK, *et al.* (2017): Effects of previous physical exercise to chronic stress on long-term aversive memory and oxidative stress in amygdala and hippocampus of rats. *Int J Dev Neurosci*. 56: 58–67.
56. Barnum CJ, Pace TW, Hu F, Neigh GN, Tansey MG (2012): Psychological stress in adolescent and adult mice increases neuroinflammation and attenuates the response to LPS challenge. *J Neuroinflammation*. 9: 9.
57. Wakizono T, Sawamura T, Shimizu K, Nibuya M, Suzuki G, Toda H, *et al.* (2007): Stress vulnerabilities in an animal model of post-traumatic stress disorder. *Physiology & behavior*. 90: 687–695.
58. Zurita A, Martijena I, Cuadra G, Brandão ML, Molina V (2000): Early exposure to chronic variable stress facilitates the occurrence of anhedonia and enhanced emotional reactions to novel stressors: reversal by naltrexone pretreatment. *Behav Brain Res*. 117: 163–171.
59. Luo Y, Cao Z, Wang D, Wu L, Li Y, Sun W, Zhu Y (2014): Dynamic study of the hippocampal volume by structural MRI in a rat model of depression. *Neurol Sci*. 35: 1777–1783.
60. Frisbee JC, Brooks SD, Stanley SC, d'Audiffret AC (2015): An Unpredictable Chronic Mild Stress Protocol for Instigating Depressive Symptoms, Behavioral Changes and Negative Health Outcomes in Rodents. *J Vis Exp*. doi: 10.3791/53109.
61. Cordner ZA, Tamashiro KLK (2016): Effects of chronic variable stress on cognition and Bace1 expression among wild-type mice. *Transl Psychiatry*. 6: e854.
62. Bhatia N, Jaggi AS, Singh N, Anand P, Dhawan R (2011): Adaptogenic potential of curcumin in experimental chronic stress and chronic unpredictable stress-induced memory deficits and alterations in functional homeostasis. *J Nat Med*. 65: 532–543.
63. Ferland CL, Hawley WR, Puckett RE, Wineberg K, Lubin FD, Dohanich GP, Schrader LA (2013): Sirtuin activity in dentate gyrus contributes to chronic stress-induced behavior and extracellular signal-regulated protein kinases 1 and 2 cascade changes in the hippocampus. *Biol Psychiatry*. 74: 927–935.
64. Lemaire-Mayo V, Subashi E, Henkous N, Béracochéa D, Pietropaolo S (2017): Behavioral effects of chronic stress in the Fmr1 mouse model of fragile X syndrome. *Behav Brain Res*. 320: 128–135.
65. Biala G, Pekala K, Boguszewska-Czubara A, Michalak A, Kruk-Slomka M, Budzyska B (2017): Behavioral and Biochemical Interaction Between Nicotine and Chronic Unpredictable Mild Stress in Mice. *Mol Neurobiol*. 54: 904–921.
66. D'Amato FR, Pavone F (2012): Modulation of nociception by social factors in rodents: contribution of the opioid system. *Psychopharmacology*.



224: 189–200.

67. Li C, Yang Y, Liu S, Fang H, Zhang Y, Furmanski O, *et al.* (2014): Stress induces pain transition by potentiation of AMPA receptor phosphorylation. *Journal of Neuroscience*. 34: 13737–13746.
68. Duque A, Vinader-Caerols C, Monleón S (2017): Indomethacin counteracts the effects of chronic social defeat stress on emotional but not recognition memory in mice. *PLoS ONE*. 12: e0173182.
69. Meerlo P, Overkamp GJ, Benning MA, Koolhaas JM, Van den Hoofdakker RH (1996): Long-term changes in open field behaviour following a single social defeat in rats can be reversed by sleep deprivation. *Physiology & behavior*. 60: 115–119.
70. Toth I, Neumann ID (2013): Animal models of social avoidance and social fear. *Cell Tissue Res*. 354: 107–118.
71. Fuertig R, Azzinnari D, Bergamini G, Cathomas F, Sigrist H, Seifritz E, *et al.* (2015): Mouse chronic social stress increases blood and brain kynurenine pathway activity and fear behaviour: both effects are reversed by inhibition of indoleamine 2,3-dioxygenase. *Brain Behav Immun*. 1–14.
72. Brzózka MM, Havemann-Reinecke U, Wichert SP, Falkai P, Rossner MJ (2015): Molecular Signatures of Psychosocial Stress and Cognition Are Modulated by Chronic Lithium Treatment. *Schizophrenia Bulletin*. sbv194.
73. Dulka BN, Lynch JF, Latsko MS, Mulvany JL, Jasnow AM (2015): Phenotypic responses to social defeat are associated with differences in cued and contextual fear discrimination. *Behav Processes*. 118: 115–122.
74. Brachman RA, McGowan JC, Perusini JN, Lim SC, Pham TH, Faye C, *et al.* (2016): Ketamine as a Prophylactic Against Stress-Induced Depressive-like Behavior. *Biol Psychiatry*. 79: 776–786.
75. Novick AM, Mears M, Forster GL, Lei Y, Tejani-Butt SM, Watt MJ (2016): Adolescent social defeat alters N-methyl-D-aspartic acid receptor expression and impairs fear learning in adulthood. *Behav Brain Res*. 304: 51–59.
76. Meduri JD, Farnbauch LA, Jasnow AM (2013): Paradoxical enhancement of fear expression and extinction deficits in mice resilient to social defeat. *Behav Brain Res*. 256: 580–590.
77. Narayanan V, Heiming RS, Jansen F, Lesting J, Sachser N, Pape H-C, Seidenbecher T (2011): Social defeat: impact on fear extinction and amygdala-prefrontal cortical theta synchrony in 5-HTT deficient mice. *PLoS ONE*. 6: e22600.
78. Pulliam JVK, Dawaghreh AM, Alema-Mensah E, Plotsky PM (2010): Social defeat stress produces prolonged alterations in acoustic startle and body weight gain in male Long Evans rats. *J Psychiatr Res*. 44: 106–111.
79. Kinn Rød AM, Murison R, Mrdalj J, Milde AM, Jellestad FK, Øvernes LA, Grønli J (2014): Effects of social defeat on sleep and behaviour: importance of the confrontational behaviour. *Physiology & behavior*. 127: 54–63.
80. Kinn Rød AM, Milde AM, Grønli J, Jellestad FK, Sundberg H, Murison R (2012): Long-term effects of footshock and social defeat on anxiety-like behaviours in rats: relationships to pre-stressor plasma corticosterone concentration. *Stress*. 15: 658–670.
81. Der-Avakian A, Mazei-Robison MS, Kesby JP, Nestler EJ, Markou A (2014): Enduring deficits in brain reward function after chronic social

- defeat in rats: susceptibility, resilience, and antidepressant response. *Biol Psychiatry*. 76: 542–549.
82. Donahue RJ, Muschamp JW, Russo SJ, Nestler EJ, Carlezon WA (2014): Effects of striatal  $\Delta$ FosB overexpression and ketamine on social defeat stress-induced anhedonia in mice. *Biol Psychiatry*. 76: 550–558.
  83. Chaouloff F (2013): Social stress models in depression research: what do they tell us? *Cell Tissue Res*. 354: 179–190.
  84. Wood SK, Wood CS, Lombard CM, Lee CS, Zhang X-Y, Finnell JE, Valentino RJ (2015): Inflammatory Factors Mediate Vulnerability to a Social Stress-Induced Depressive-like Phenotype in Passive Coping Rats. *Biol Psychiatry*. 78: 38–48.
  85. Krishnan V, Han M-H, Graham DL, Berton O, Renthal W, Russo SJ, *et al.* (2007): Molecular adaptations underlying susceptibility and resistance to social defeat in brain reward regions. *Cell*. 131: 391–404.
  86. McKim DB, Niraula A, Tarr AJ, Wohleb ES, Sheridan JF, Godbout JP (2016): Neuroinflammatory Dynamics Underlie Memory Impairments after Repeated Social Defeat. *Journal of Neuroscience*. 36: 2590–2604.
  87. Buwalda B, Kole MHP, Veenema AH, Huininga M, De Boer SF, Korte SM, Koolhaas JM (2005): Long-term effects of social stress on brain and behavior: a focus on hippocampal functioning. *Neurosci Biobehav Rev*. 29: 83–97.
  88. Yu T, Guo M, Garza J, Rendon S, Sun X-L, Zhang W, Lu X-Y (2011): Cognitive and neural correlates of depression-like behaviour in socially defeated mice: an animal model of depression with cognitive dysfunction. *Int J Neuropsychopharmacol*. 14: 303–317.
  89. Diehl LA, Silveira PP, Leite MC, Crema LM, Portella AK, Billodre MN, *et al.* (2007): Long lasting sex-specific effects upon behavior and S100b levels after maternal separation and exposure to a model of post-traumatic stress disorder in rats. *Brain Res*. 1144: 107–116.
  90. Caldarone BJ, George TP, Zachariou V, Picciotto MR (2000): Gender differences in learned helplessness behavior are influenced by genetic background. *Pharmacol Biochem Behav*. 66: 811–817.
  91. Mazar A, Matar MA, Kaplan Z, Kozlovsky N, Zohar J, Cohen H (2009): Gender-related qualitative differences in baseline and post-stress anxiety responses are not reflected in the incidence of criterion-based PTSD-like behaviour patterns. *World J Biol Psychiatry*. 10: 856–869.
  92. Toth M, Flandreau EI, Deslauriers J, Geyer MA, Mansuy I, Merlo-Pich E, Risbrough V (2015): Overexpression of Forebrain CRH During Early Life Increases Trauma Susceptibility in Adulthood. *Neuropsychopharmacology*. doi: 10.1038/npp.2015.338.
  93. Shepard R, Page CE, Coutellier L (2016): Sensitivity of the prefrontal GABAergic system to chronic stress in male and female mice: relevance for sex differences in stress-related disorders. *Neuroscience*. 332: 1–12.
  94. Steinman MQ, Trainor BC (2017): Sex differences in the effects of social defeat on brain and behavior in the California mouse: Insights from a monogamous rodent. *Semin Cell Dev Biol*. 61: 92–98.
  95. Shimamoto A, Holly EN, Boyson CO, DeBold JF, Miczek KA (2014): Individual differences in anhedonic and accumbal dopamine responses to chronic social stress and their link to cocaine self-administration in female rats. *Psychopharmacology*. 232: 825–834.
  96. McLaughlin KJ, Baran SE, Wright RL, Conrad CD (2005): Chronic stress enhances spatial memory in ovariectomized female rats despite CA3 dendritic retraction: possible involvement of CA1 neurons. *Neuroscience*. 135: 1045–1054.

97. Galea LA, McEwen BS, Tanapat P, Deak T, Spencer RL, Dhabhar FS (1997): Sex differences in dendritic atrophy of CA3 pyramidal neurons in response to chronic restraint stress. *Neuroscience*. 81: 689–697.
98. Barha CK, Brummelte S, Lieblich SE, Galea LAM (2011): Chronic restraint stress in adolescence differentially influences hypothalamic-pituitary-adrenal axis function and adult hippocampal neurogenesis in male and female rats. *Hippocampus*. 21: 1216–1227.
99. Jefferson F, Ehlen JC, Williams NS, Montemarano JJ, Paul KN (2014): A dopamine receptor d2-type agonist attenuates the ability of stress to alter sleep in mice. *Endocrinology*. 155: 4411–4421.
100. Koehl M, Battle S, Meerlo P (2006): Sex differences in sleep: the response to sleep deprivation and restraint stress in mice. *Sleep*. 29: 1224–1231.
101. Page GG, Opp MR, Kozachik SL (2016): Sex differences in sleep, anhedonia, and HPA axis activity in a rat model of chronic social defeat. *Neurobiology of Stress*. 3: 105–113.
102. Flandreau E, Risbrough V, Lu A, Ableitner M, Geyer MA, Holsboer F, Deussing JM (2015): Cell type-specific modifications of corticotropin-releasing factor (CRF) and its type 1 receptor (CRF1) on startle behavior and sensorimotor gating. *Psychoneuroendocrinology*. 53: 16–28.
103. Wohleb ES (2016): Neuron-Microglia Interactions in Mental Health Disorders: "For Better, and For Worse". *Front Immunol*. 7: 544.
104. Deslauriers J, Powell SB, Risbrough VB (2017): Immune signaling mechanisms of PTSD risk and symptom development: insights from animal models. *Current Opinion in Behavioral Sciences*. 14: 123–132.
105. Daskalakis NP, Yehuda R (2014): Principles for developing animal models of military PTSD. *Eur J Psychotraumatol*. 5. doi: 10.3402/ejpt.v5.23825.
106. Sparta DR, Jennings JH, Ung RL, Stuber GD (2013): Optogenetic strategies to investigate neural circuitry engaged by stress. *Behav Brain Res*. 255: 19–25.
107. Kim CK, Adhikari A, Deisseroth K (2017): Integration of optogenetics with complementary methodologies in systems neuroscience. *Nat Rev Neurosci*. 18: 222–235.
108. Andero R, Dias BG, Ressler KJ (2014): A role for Tac2, NkB, and Nk3 receptor in normal and dysregulated fear memory consolidation. *Neuron*. 83: 444–454.
109. Gafford GM, Ressler KJ (2016): Mouse models of fear-related disorders: Cell-type-specific manipulations in amygdala. *Neuroscience*. 321: 108–120.
110. Roth BL (2016): DREADDs for Neuroscientists. *Neuron*. 89: 683–694.
